# Supplementary material for: Band gap modulation and nonlinear optical properties of quaternary tellurates Li2GeTeO6
Source: Royal Society of Chemistry journal article supplement (doi:10.1039/d2dt01320g), 2022-01-01
Supplement: d2dt01320g1.pdf [file d2dt01320g1.pdf]

## Electronic Supplementary Information (ESI)

### Band Gap Modulation and Nonlinear Optical Properties of Quaternary Tellurates $\text{Li}_2\text{GeTeO}_6$

Dan Wang,<sup>a#</sup> Yunxi Zhang,<sup>a#</sup> Qian Liu,<sup>a</sup> Bingbing Zhang,<sup>a</sup> Daqing Yang,<sup>a</sup> and Ying  
Wang<sup>\*a</sup>

<sup>a</sup>College of Chemistry and Environmental Science, Hebei University, Baoding 071002, China.

Email: wangy@hbu.edu.cn.

<sup>#</sup>These authors contributed equally to this work.

#### Table of contents

|                                                                                                                                                                            |     |
|----------------------------------------------------------------------------------------------------------------------------------------------------------------------------|-----|
| 1. Experimental section.....                                                                                                                                               | S2  |
| 2. Table S1. Crystal data and structure refinements.....                                                                                                                   | S5  |
| 3. Table S2. Atomic coordinates and equivalent isotropic displacement parameters.....                                                                                      | S6  |
| 4. Table S3. Bond lengths [Å] and angles [deg].....                                                                                                                        | S7  |
| 5. Table S4. Comparison of structure and optical properties of NLO active-quaternary tellurates..<br>.....                                                                 | S9  |
| 6. Figure S1. Structural comparison of $\text{Li}_2\text{ZrTeO}_6$ , $\alpha\text{-Li}_2\text{HfTeO}_6$ , $\text{Li}_2\text{SnTeO}_6$ , and $\text{Li}_2\text{TiTeO}_6$ .. | S10 |
| 7. Figure S2. The SEM and EDX graph of $\text{Li}_2\text{GeTeO}_6$ .....                                                                                                   | S11 |
| 8. Figure S3. The calculated and experimental powder XRD patterns of $\text{Li}_2\text{GeTeO}_6$ .....                                                                     | S12 |
| 9. Figure S4. The TG and DSC curves of $\text{Li}_2\text{GeTeO}_6$ .....                                                                                                   | S13 |
| 10. Figure S5. The IR spectrum of $\text{Li}_2\text{GeTeO}_6$ .....                                                                                                        | S14 |
| 11. Figure S6. The bandgap of $\text{Li}_2\text{GeTeO}_6$ .....                                                                                                            | S15 |
| 12. Figure S7. The PDOS of $\text{Li}_2\text{GeTeO}_6$<br>.....                                                                                                            | S16 |
| 13. Figure S8. SHG density maps of the occupied and unoccupied orbitals in the VH process of<br>$\text{Li}_2\text{GeTeO}_6$ .....                                          | S17 |
| 14. Reference.....<br>...S18                                                                                                                                               |     |

## Experimental section

**Synthesis.** All chemicals were used as received.  $\text{Li}_2\text{CO}_3$  ( $\geq 99.0\%$ , aladdin),  $\text{GeO}_2$  (99.99%, Hawk), and  $\text{TeO}_2$  (99.99%, Hawk) were all used as raw materials. Single crystals of  $\text{Li}_2\text{GeTeO}_6$  were obtained by using the high-temperature flux method. The mixture of  $\text{Li}_2\text{CO}_3$ ,  $\text{GeO}_2$ , and  $\text{TeO}_2$  in a molar ratio of 2.5 : 1 : 4 was fully grounded and placed in an alumina crucible. The crucible was heated to 720 °C in 3 h, and held at this temperature for 12 h. Afterward, the solution was cooled slowly to 500 °C with a rate of 2 °C  $\text{h}^{-1}$ , and then cooled the room temperature quickly. Colorless crystals of  $\text{Li}_2\text{GeTeO}_6$  were obtained from the surface of the crucible (yield: about 70% based on Ge).

The polycrystalline powder samples of  $\text{Li}_2\text{GeTeO}_6$  were prepared via the solid-state reaction method in air. A mixture of  $\text{Li}_2\text{CO}_3$ ,  $\text{TeO}_2$ , and  $\text{GeO}_2$  with a stoichiometric ratio was fully ground and loaded into a corundum crucible, heated to 700 °C at a rate of 3 °C  $\text{min}^{-1}$ , held at this temperature for 48 hours, then heat to 750 °C for 12 h with several intermittent grindings. The chemical reaction process can be expressed as follows:  $\text{Li}_2\text{CO}_3 + \text{GeO}_2 + \text{TeO}_2 + 1/2 \text{O}_2 = \text{Li}_2\text{GeTeO}_6 + \text{CO}_2$ .

**Characterization.** The single-crystal X-ray diffraction (XRD) data were collected on a Bruker D8 VENTURE dual-wavelength Mo/Cu three-circle diffractometer with a microfocus sealed X-ray tube using mirror optics as monochromator and a Bruker PHOTON III detector. The diffractometer used  $\text{MoK}\alpha$  radiation ( $\lambda = 0.71073 \text{ \AA}$ ) for data collection. All data were integrated with SAINT program<sup>1</sup> and a multi-scan absorption correction using SADABS<sup>2</sup> was applied. The structure was solved by Intrinsic Phasing methods using SHELXT<sup>3</sup> and refined by full-matrix least-squares methods against  $F^2$  by SHELXL<sup>4</sup>, embedding within the *Olex2* program.<sup>5</sup> Potential higher symmetry was checked by PLATON.<sup>6</sup> Crystal data and refinement details, atomic coordinates, and selected bond distances and angles are listed in Tables S1-S3. Powder XRD data were measured on a Dandong Haoyuan DX-27mini X-ray diffractometer with  $\text{Cu K}\alpha$  radiation ( $\lambda = 1.54056 \text{ \AA}$ ). The powder XRD pattern was scanned over the  $2\theta$  angles range of 10-70°, at a scanning step width of 0.02° and a

fixed counting time of 2 s. The thermal gravimetric (TG) analysis and differential scanning calorimetry (DSC) were studied with a NETZSCH5 instrument under air. The sample was placed in an Al<sub>2</sub>O<sub>3</sub> crucible and heated from 30 to 1000 °C with a heating rate of 10 °C·min<sup>-1</sup>. The infrared spectra were recorded on a Shimadzu IR Affinity-1 Fourier transform infrared spectrometer in the range of 400 - 4000 cm<sup>-1</sup>. The sample was grounded and mixed with KBr. The UV-Vis-NIR diffuse reflectance spectra were measured at room temperature with a Shimadzu SolidSpec-3600DUV spectrophotometer in the 200-1100 nm wavelength range. The SHG effects of the powder samples were measured by using a modified Kurtz-Perry method<sup>7</sup> with a Q-switched 1064 nm Nd: YAG laser. The samples were ground and divided into fractions according to different particle size ranges: 20-38.5, 38.5-55, 55-80, 80-125, 125-160, 160-200, and 200-250 μm. The same particle-sized KDP samples were used as the standard. The optical damage induced by the laser was tested on crystalline powder pellet samples using a Q-switched 1064 nm Nd: YAG laser (1064 nm, 7 ns, 1 Hz). The pulse energy was changed from 20 to 100 mJ and a convex lens was used to adjust the beam diameter. The damaged area can be directly observed under a microscope.

**Theoretical Calculations.** The electronic structures and optical properties for Li<sub>2</sub>GeTeO<sub>6</sub> were calculated by using the CASTEP package.<sup>8</sup> The generalized gradient-approximation (GGA) with Perdew-Burke-Ernzerhof (PBE) functional was adopted to describe the exchange-correlation potential.<sup>9</sup> The norm-conserving pseudopotentials (NCP) were adopted to model the effective interaction between the valence electrons and atom cores.<sup>10</sup> The configurations for diverse electron orbital were Li: 2s<sup>2</sup>, Ge: 4s<sup>2</sup>4p<sup>2</sup>, Te: 5s<sup>2</sup>5p<sup>4</sup>, and O: 2s<sup>2</sup>2p<sup>4</sup>, respectively. The cut off energies and the dense *K*-points in the Brillouin zone were set as 750 eV and 3 × 3 × 2. In addition, a scissors operator was used to correct the underestimation of band gap induced by PBE-GGA. On the basis of the scissor-corrected electron band structure, the second-order NLO coefficients  $d_{ij}$  were calculated using the length-gauge formalism at a zero-frequency limit.<sup>11</sup> The static second-order nonlinear susceptibilities can be ascribed to Virtual-Hole (VH) and Virtual-Electron (VE) processes. In addition, to visualize the

contribution of each atom to the SHG response, the SHG-weighted electron density method was adopted.<sup>12, 13</sup>

**Table S1.** Crystal data and structure refinements for  $\text{Li}_2\text{GeTeO}_6$ .

| Compound                                         | $\text{Li}_2\text{GeTeO}_6$                                  |
|--------------------------------------------------|--------------------------------------------------------------|
| Formula weight                                   | 310.07                                                       |
| Temperature (K)                                  | 273(2)                                                       |
| Crystal system                                   | Trigonal                                                     |
| Space group (number)                             | $R\bar{3}$ (No. 146)                                         |
| $a$ (Å)                                          | 4.996(3)                                                     |
| $b$ (Å)                                          | 4.996(3)                                                     |
| $c$ (Å)                                          | 14.335(12)                                                   |
| Volume (Å <sup>3</sup> )                         | 309.8(5)                                                     |
| $Z$                                              | 3                                                            |
| $\rho_{\text{calc}}$ (g·cm <sup>-3</sup> )       | 4.985                                                        |
| $\mu$ (mm <sup>-1</sup> )                        | 14.272                                                       |
| $F(000)$                                         | 414                                                          |
| $2\Theta$ range (deg.)                           | 8.53 to 56.61                                                |
| Limiting indices                                 | $-6 \leq h \leq 6; -6 \leq k \leq 6; -18 \leq l \leq 18$     |
| Reflections collected / unique                   | 1414                                                         |
| Independent reflections                          | 353 ( $R_{\text{int}} = 0.0733, R_{\text{sigma}} = 0.0629$ ) |
| Completeness to $\Theta = 25.242^\circ$          | 100.0 %                                                      |
| Data / restraints / parameters                   | 353/7/32                                                     |
| Goodness-of-fit on $F^2$                         | 1.085                                                        |
| $R_1, wR_2 [F_o^2 > 2\sigma(F_o^2)]^a$           | $R_1 = 0.0323; wR_2 = 0.0575$                                |
| $R_1, wR_2$ (all data) <sup>a</sup>              | $R_1 = 0.0424; wR_2 = 0.0598$                                |
| Largest diff. peak and hole (e·Å <sup>-3</sup> ) | 1.94/-1.27                                                   |
| Flack parameter                                  | 0.23(6)                                                      |

<sup>a</sup>  $R_1 = \sum ||F_o| - |F_c|| / \sum |F_o|$  and  $wR_2 = [\sum w(F_o^2 - F_c^2)^2 / \sum w F_o^4]^{1/2}$  for  $F_o^2 > 2\sigma(F_o^2)$ .

---

**Electronic Supplementary Information (ESI)**

---

**Table S2.** Atomic coordinates and equivalent isotropic displacement parameters for  $\text{Li}_2\text{GeTeO}_6$ .  $U(\text{eq})$  is defined as one-third of the trace of the orthogonalized  $U_{ij}$  tensor.

| <b>atom</b> | <b><i>x</i></b> | <b><i>y</i></b> | <b><i>z</i></b> | <b>U(eq)</b> | <b>BVS</b> |
|-------------|-----------------|-----------------|-----------------|--------------|------------|
| Li(1)       | 0.666667        | 0.333333        | 0.635(4)        | 0.02(2)      | 0.906      |
| Li(2)       | 0.333333        | 0.666667        | 0.699(4)        | 0.020(15)    | 0.909      |
| Ge(1)       | 0.000000        | 0.000000        | 0.50701(15)     | 0.0071(7)    | 3.910      |
| Te(1)       | 0.333333        | 0.666667        | 0.49362(15)     | 0.0110(5)    | 6.004      |
| O(1)        | 0.298(5)        | 0.340(5)        | 0.575(3)        | 0.013(6)     | 1.915      |
| O(2)        | 0.678(5)        | 0.708(4)        | 0.425(2)        | 0.005(5)     | 1.995      |

**Table S3.** Bond lengths [Å] and angles [degree] for Li<sub>2</sub>GeTeO<sub>6</sub>.

| Atom–Atom             | Length [Å] | Atom–Atom–Atom | Angle [°] |
|-----------------------|------------|----------------|-----------|
| Li1–O1                | 2.05(4)    | O1–Li1–O1      | 103(2)    |
| Li1–O1 <sup>#1</sup>  | 2.05(4)    | O1–Li1–O1      | 103(2)    |
| Li1–O1 <sup>#2</sup>  | 2.05(4)    | O1–Li1–O1      | 103(2)    |
| Li1–O2 <sup>#3</sup>  | 2.35(5)    | O1–Li1–O2      | 156(3)    |
| Li1–O2 <sup>#4</sup>  | 2.35(5)    | O1–Li1–O2      | 89.3(8)   |
| Li1–O2 <sup>#5</sup>  | 2.35(5)    | O1–Li1–O2      | 93.4(11)  |
| Li2–O2 <sup>#5</sup>  | 2.03(3)    | O1–Li1–O2      | 89.3(8)   |
| Li2–O2 <sup>#9</sup>  | 2.03(3)    | O1–Li1–O2      | 93.4(11)  |
| Li2–O2 <sup>#10</sup> | 2.03(3)    | O1–Li1–O2      | 156(3)    |
| Li2–O1                | 2.37(5)    | O2–Li1–O2      | 69.2(16)  |
| Li2–O1 <sup>#11</sup> | 2.37(5)    | O1–Li1–O2      | 93.4(11)  |
| Li2–O1 <sup>#12</sup> | 2.37(5)    | O1–Li1–O2      | 156(3)    |
| Ge1–O1 <sup>#13</sup> | 1.87(3)    | O1–Li1–O2      | 89.3(8)   |
| Ge1–O1 <sup>#14</sup> | 1.87(3)    | O2–Li1–O2      | 69.2(16)  |
| Ge1–O1                | 1.87(3)    | O2–Li1–O2      | 69.2(16)  |
| Ge1–O2 <sup>#15</sup> | 1.93(2)    | O2–Li2–O2      | 103.7(19) |
| Ge1–O2 <sup>#11</sup> | 1.93(2)    | O2–Li2–O2      | 103.7(19) |
| Ge1–O2 <sup>#1</sup>  | 1.93(2)    | O2–Li2–O2      | 103.7(19) |
| Te1–O2 <sup>#11</sup> | 1.90(3)    | O2–Li2–O1      | 93.2(10)  |
| Te1–O2 <sup>#12</sup> | 1.90(3)    | O2–Li2–O1      | 89.0(8)   |
| Te1–O2                | 1.90(3)    | O2–Li2–O1      | 156(3)    |
| Te1–O1 <sup>#12</sup> | 1.94(2)    | O2–Li2–O1      | 156(3)    |
| Te1–O1 <sup>#11</sup> | 1.94(2)    | O2–Li2–O1      | 93.2(10)  |
| Te1–O1                | 1.94(2)    | O2–Li2–O1      | 89.0(8)   |
|                       |            | O1–Li2–O1      | 69.2(17)  |
|                       |            | O2–Li2–O1      | 89.0(8)   |
|                       |            | O2–Li2–O1      | 156(3)    |
|                       |            | O2–Li2–O1      | 93.2(10)  |
|                       |            | O1–Li2–O1      | 69.2(17)  |
|                       |            | O1–Li2–O1      | 69.2(17)  |
|                       |            | O1–Ge1–O1      | 95.7(12)  |
|                       |            | O1–Ge1–O1      | 95.7(12)  |
|                       |            | O1–Ge1–O1      | 95.7(12)  |
|                       |            | O1–Ge1–O2      | 95.5(4)   |
|                       |            | O1–Ge1–O2      | 82.1(6)   |
|                       |            | O1–Ge1–O2      | 168.8(9)  |
|                       |            | O1–Ge1–O2      | 168.8(9)  |
|                       |            | O1–Ge1–O2      | 95.5(4)   |

## Electronic Supplementary Information (ESI)

---

|           |          |
|-----------|----------|
| O1–Ge1–O2 | 82.1(6)  |
| O2–Ge1–O2 | 87.1(15) |
| O1–Ge1–O2 | 82.1(6)  |
| O1–Ge1–O2 | 168.8(9) |
| O1–Ge1–O2 | 95.5(4)  |
| O2–Ge1–O2 | 87.1(15) |
| O2–Ge1–O2 | 87.1(15) |
| O2–Te1–O2 | 95.8(11) |
| O2–Te1–O2 | 95.8(11) |
| O2–Te1–O2 | 95.8(11) |
| O2–Te1–O1 | 168.6(9) |
| O2–Te1–O1 | 95.5(4)  |
| O2–Te1–O1 | 81.4(9)  |
| O2–Te1–O1 | 95.5(4)  |
| O2–Te1–O1 | 81.4(9)  |
| O2–Te1–O1 | 168.6(9) |
| O1–Te1–O1 | 87.8(15) |
| O2–Te1–O1 | 81.4(9)  |
| O2–Te1–O1 | 168.6(9) |
| O2–Te1–O1 | 95.5(4)  |
| O1–Te1–O1 | 87.8(15) |
| O1–Te1–O1 | 87.8(15) |

---

Symmetry transformations used to generate equivalent atoms:

#1: 1-Y, +X-Y, +Z; #2: 1-X+Y, 1-X, +Z; #3: 1.66667-Y, 0.33333+X-Y, 0.33333+Z; #4: -0.33333+X, -0.66667+Y, 0.33333+Z; #5: 0.66667-X+Y, 1.33333-X, 0.33333+Z; #6: 0.66667+X, 0.33333+Y, 0.33333+Z; #7: 1+X, +Y, +Z; #8: +X, -1+Y, +Z; #9: 0.66667-Y, 0.33333+X-Y, 0.33333+Z; #10: -0.33333+X, 0.33333+Y, 0.33333+Z; #11: -X+Y, 1-X, +Z; #12: 1-Y, 1+X-Y, +Z; #13: -1+X, +Y, +Z; #14: +X, 1+Y, +Z; #15: -X+Y, -X, +Z; #16: -Y, +X-Y, +Z; #17: -1+X, -1+Y, +Z; #18: -0.66667+X, -0.33333+Y, -0.33333+Z; #19: 1+X, 1+Y, +Z; #20: 0.33333+X, -0.33333+Y, -0.33333+Z; #21: 0.33333+X, 0.66667+Y, -0.33333+Z;



**Table S4.** Comparison of structure and optical properties of NLO active-quaternary tellurates.

| compounds                          | space group | octahedral distortion $\Delta d$ |                | band gap (eV) | SHG ( $\times$ KDP) | transparent region ( $\mu\text{m}$ ) | LDT ( $\text{MW cm}^{-2}$ ) |
|------------------------------------|-------------|----------------------------------|----------------|---------------|---------------------|--------------------------------------|-----------------------------|
|                                    |             | $\text{MO}_6$                    | $\text{TeO}_6$ |               |                     |                                      |                             |
| $\text{Li}_2\text{TiTeO}_6$        | <i>Pnn2</i> | 0.20                             | 0.06           | 3.26          | 26                  | 0.38-6.72                            | 550                         |
| $\text{Li}_2\text{ZrTeO}_6$        | <i>R3</i>   | 0.12                             | 0.02           | 4.06          | 2.5                 | 0.29-7.4                             | 1300                        |
| $\alpha\text{-Li}_2\text{HfTeO}_6$ | <i>R3</i>   | 0.19                             | 0.06           | 3.98          | 2.2                 | 0.27-8 <sup>#</sup>                  | 1000                        |
| $\text{Li}_2\text{SnTeO}_6$        | <i>Pnn2</i> | 0.01                             | 0.09           | 3.26          | 2.5                 | 0.38-6.86                            | 672                         |
| $\text{Li}_2\text{GeTeO}_6^*$      | <i>R3</i>   | 0.16                             | 0.13           | 4.65          | 1.3                 | 0.24-10 <sup>#</sup>                 | 1725                        |

\*This work

<sup>#</sup>Based on polycrystalline samples. It should be noted that the IR cut-off edges is deduced from powder IR spectrum which were not highly precise.

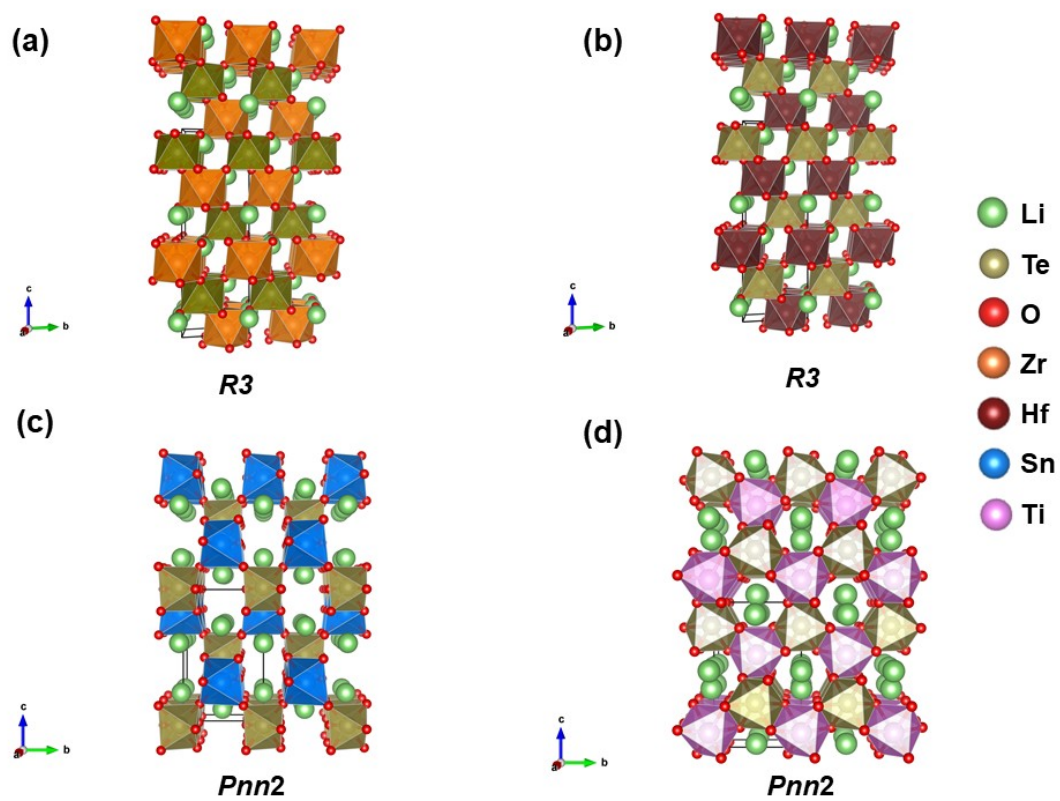

**Figure S1.** Structural comparison of (a)  $\text{Li}_2\text{ZrTeO}_6$ , (b)  $\alpha\text{-Li}_2\text{HfTeO}_6$ , (c)  $\text{Li}_2\text{SnTeO}_6$ , and (d)  $\text{Li}_2\text{TiTeO}_6$ .

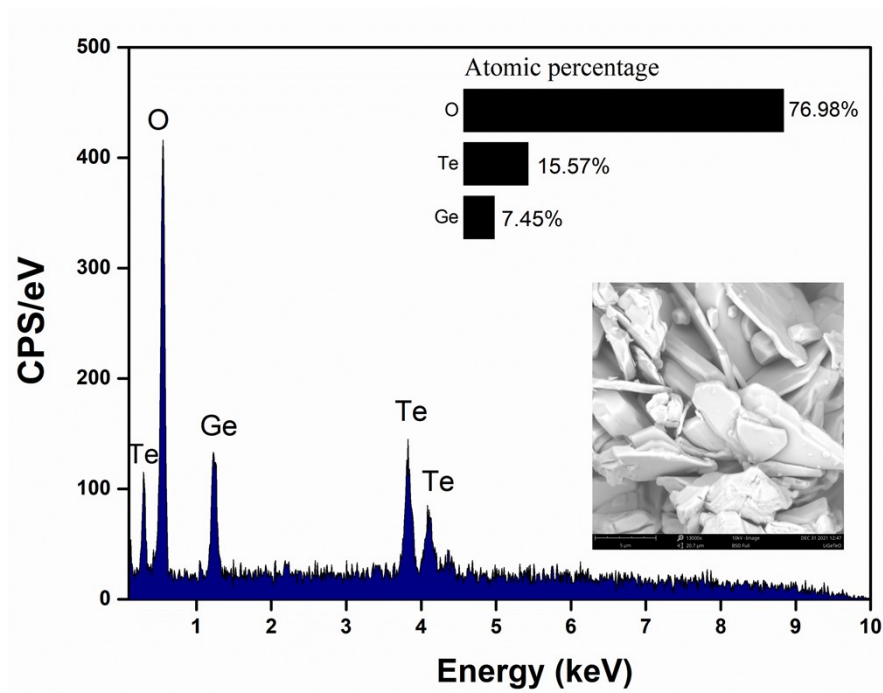

**Figure S2.** The SEM and EDX of  $\text{Li}_2\text{GeTeO}_6$ . Noted that the EDX only provides semi-quantitative results, and the Li elements are ignored due to the drawback of EDX analysis.

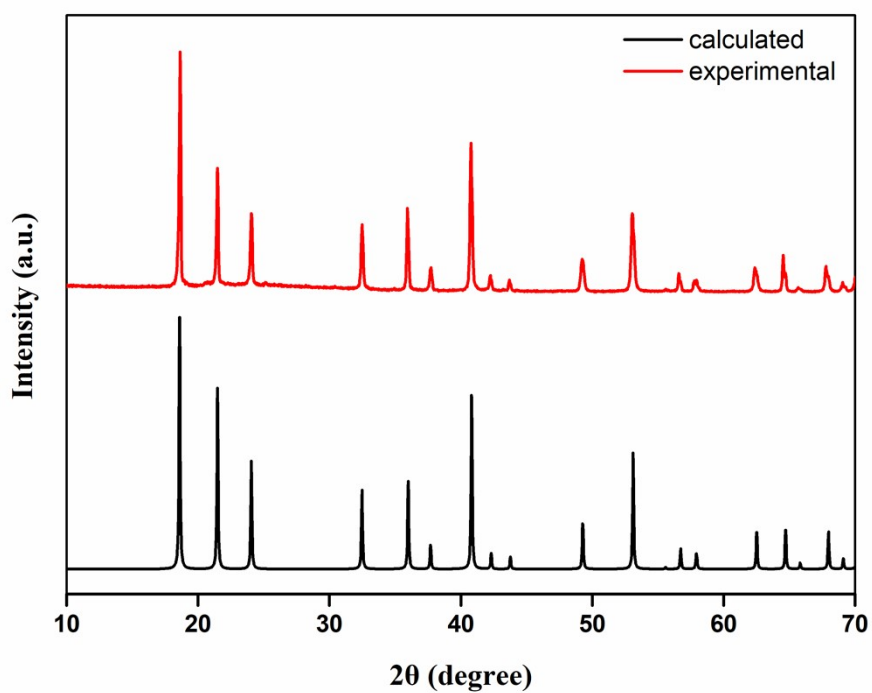

**Figure S3.** The calculated and experimental powder XRD patterns of  $\text{Li}_2\text{GeTeO}_6$ .

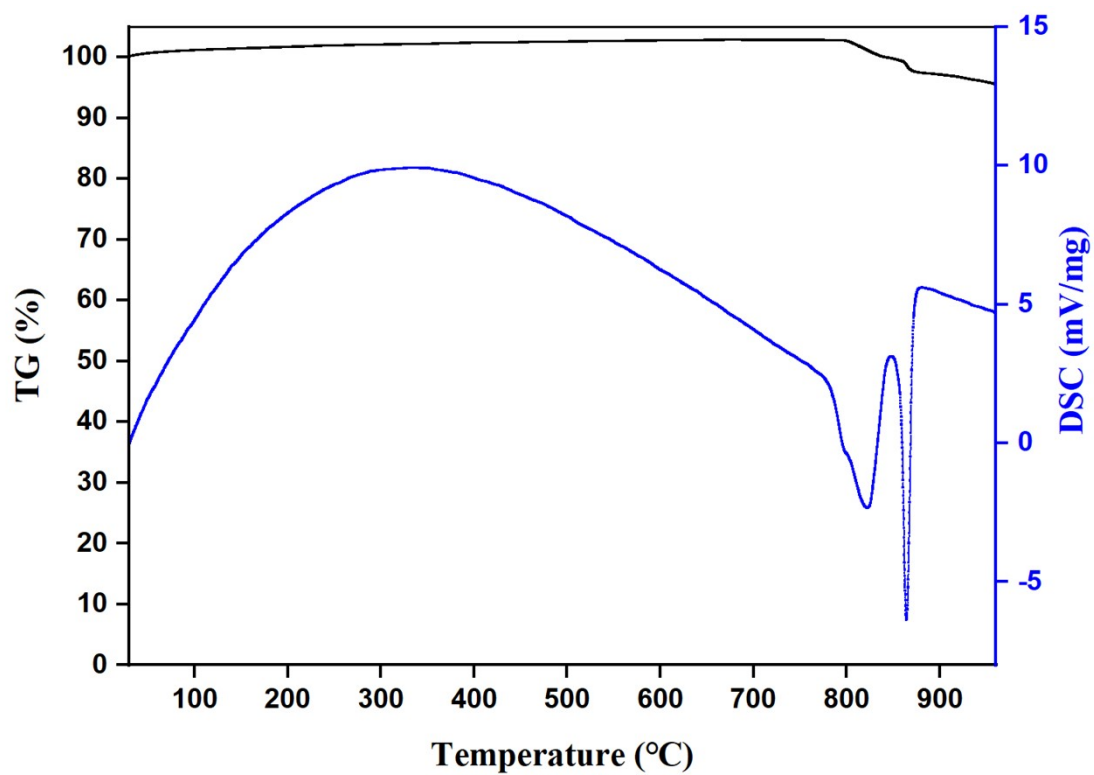

**Figure S4.** The TG and DSC curves of  $\text{Li}_2\text{GeTeO}_6$ .

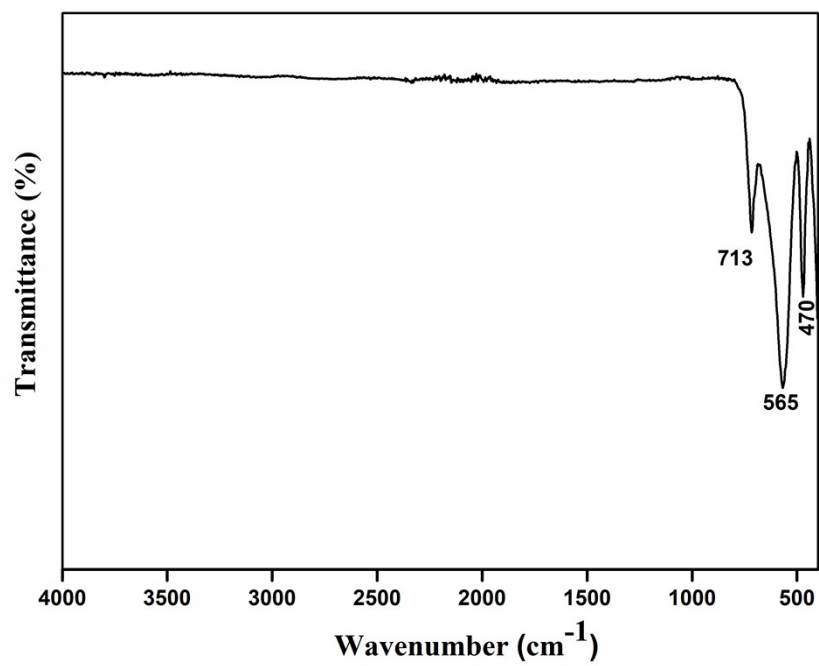

**Figure S5.** The IR spectrum of  $\text{Li}_2\text{GeTeO}_6$ .

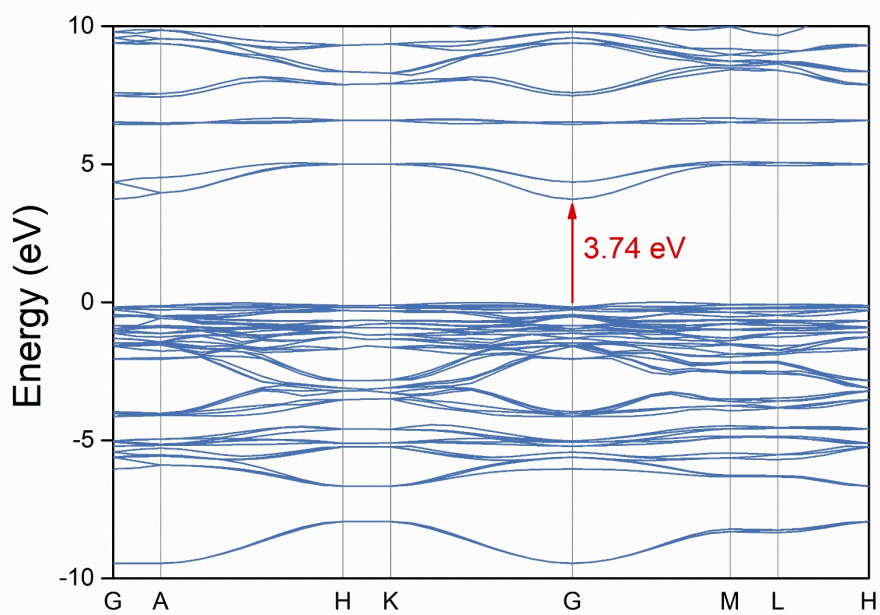

Figure S6. The band gap of  $\text{Li}_2\text{GeTeO}_6$ .

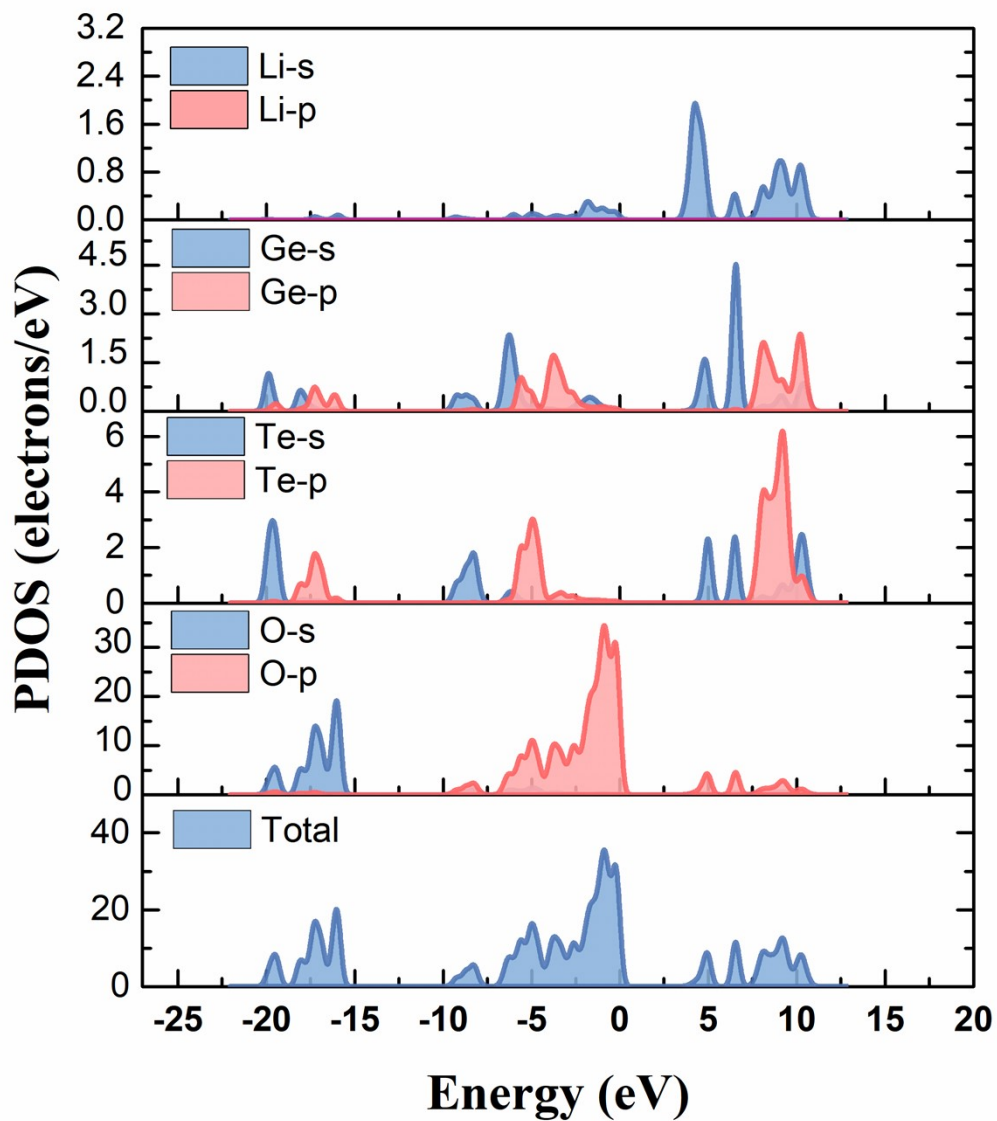

Figure S7. The DOS and PDOS of  $\text{Li}_2\text{GeTeO}_6$ .



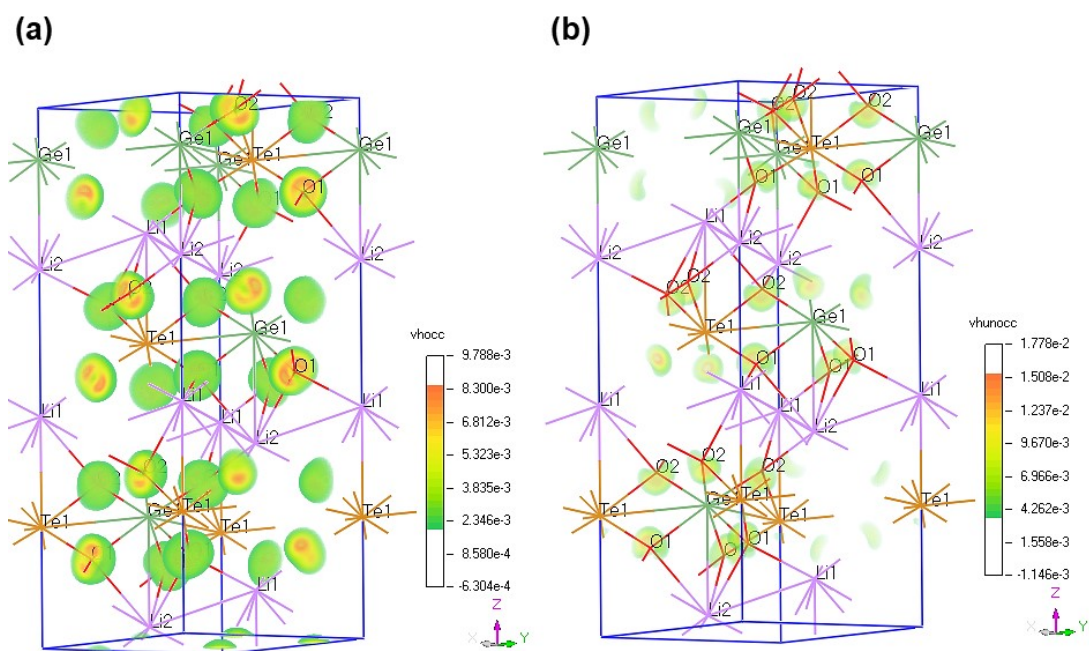

**Figure S8.** SHG density maps of the occupied and unoccupied orbitals in the VH process of  $\text{Li}_2\text{GeTeO}_6$ . (a) VH occupied; (b) VH unoccupied.

## Reference

1. SAINT, *Version 7.60A, Bruker analytical X-ray Instruments, inc., Madison, WI, 2008.*
2. L. Krause, R. Herbst-Irmer, G. M. Sheldrick and D. Stalke, *J. Appl. Cryst.*, 2015, **48**, 3-10.
3. G. Sheldrick, *Acta Cryst.*, 2015, **A71**, 3-8.
4. G. Sheldrick, *Acta Cryst.*, 2015, **C71**, 3-8.
5. O. V. Dolomanov, L. J. Bourhis, R. J. Gildea, J. A. K. Howard and H. Puschmann, *J. Appl. Cryst.*, 2009, **42**, 339-341.
6. A. L. Spek, *J. Appl. Crystallogr.*, 2003, **36**, 7-13.
7. S. K. Kurtz and T. T. Perry, *J. Appl. Phys.*, 1968, **39**, 3798-3813.
8. S. J. Clark, M. D. Segall, C. J. Pickard, P. J. Hasnip, M. I. J. Probert, K. Refson and M. C. Payne, *Z. Kristallogr.*, 2005, **220**, 567-570.
9. J. S. Lin, A. Qteish, M. C. Payne and V. Heine, *Phys. Rev. B*, 1993, **47**, 4174-4180.
10. A. M. Rappe, K. M. Rabe, E. Kaxiras and J. D. Joannopoulos, *Phys. Rev. B*, 1990, **41**, 1227-1230.
11. S. N. Rashkeev., W. R. L. Lambrecht. and B. Segall., *Phys. Rev. B*, 1998, **57**, 3905-3919.
12. H. K. Liu, Y. Wang, B. B. Zhang, Z. H. Yang and S. L. Pan, *Chem. Sci.*, 2019, **11**, 694-698.
13. M. H. Lee, C. H. Yang and J. H. Jan, *Phys. Rev. B*, 2004, **70**, 235110.
